# Supplementary material for: A novel PAD4/SOX4/PU.1 signaling pathway is involved in the committed differentiation of acute promyelocytic leukemia cells into granulocytic cells
Source: PubMed Central journal article supplement (PMC4823096; doi:10.18632/oncotarget.6551), 2015-12-10
Supplement: oncotarget-07-3144-s001.pdf [file oncotarget-07-3144-s001.pdf]

## A novel PAD4/SOX4/PU.1 signaling pathway is involved in the committed differentiation of acute promyelocytic leukemia cells into granulocytic cells

### Supplementary Materials

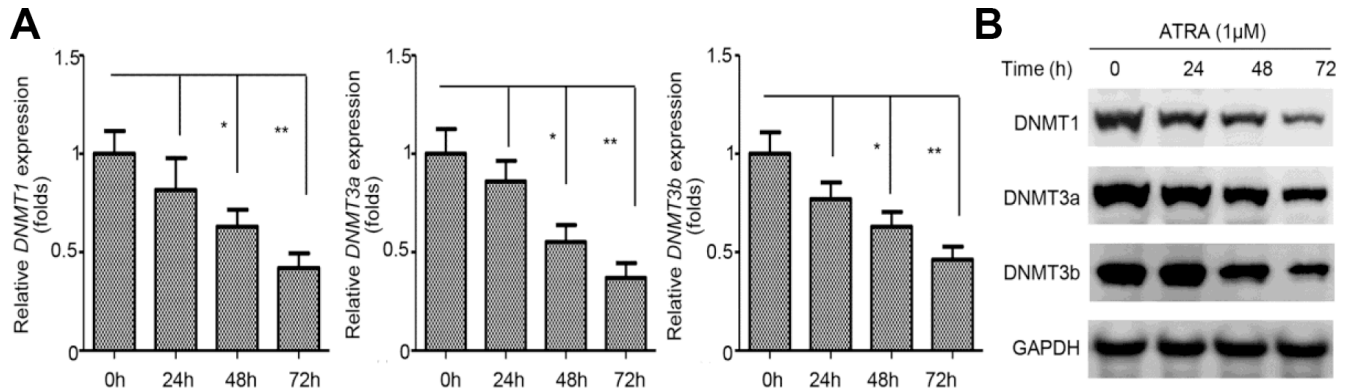

**Supplementary Figure S1: ATRA treatment suppresses the expression of DNMTs.** (A) and (B) Expression of three DNMTs was detected by RT-PCR (A) and Western blot analysis (B) after treatment with ATRA (1  $\mu$ M) at indicated timepoints.

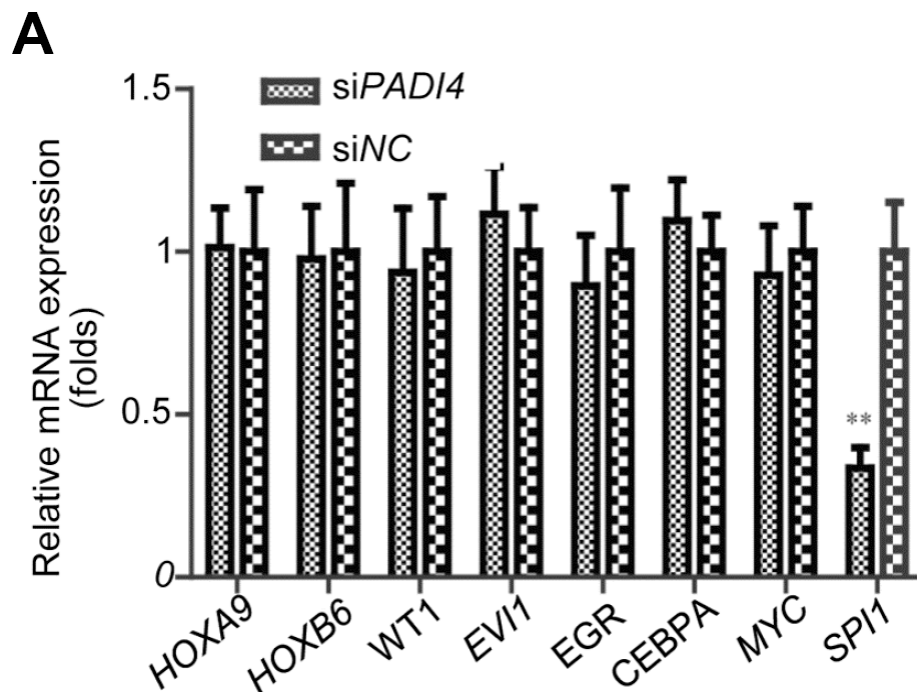

**Supplementary Figure 2: PU.1 was regulated by PAD4.** (A) Expression of *SPI1*, *HOXA9*, *HOXB6*, *WT1*, *EVI1*, and *EGR* after silencing PAD4 in ATRA-induced HL-60 cells.  $**P < 0.01$ . Data are means of biological triplicates ( $\pm$  standard error) and representative of triplicate experiments.

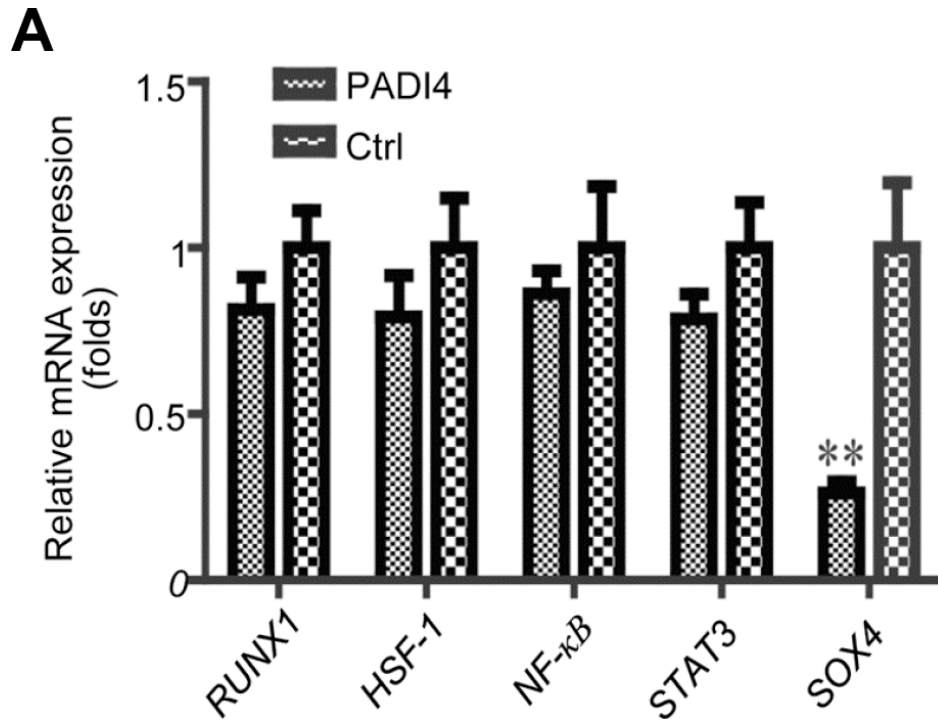

**Supplementary Figure 3: SOX4 was regulated by PAD4.** (A) Expression of *RUNX1*, *HSF-1*, *NF- $\kappa$ B*, *STAT3*, and *SOX4* after silencing PAD4 in ATRA-induced HL-60 cells. \*\* $P < 0.01$ . Data are means of biological triplicates ( $\pm$  standard error) and representative of triplicate experiments.

**Supplementary Table S1: Primers used in this study**

| Gene            | Forward                  | Reverse                    |
|-----------------|--------------------------|----------------------------|
| <b>qRT-PCR</b>  |                          |                            |
| <i>PADI4</i>    | GTTTAGGGTCAGACAGTCTGG    | AGATGTGAGTAGTGGCACATGC     |
| <i>SOX4</i>     | ACACTGGTGGCAGGTTAAGG     | CGCTGTTTGGATTTCTGAT        |
| <i>PU.1</i>     | CTGTTGGACCTGCTCCGCA      | TGCGGAGCAGGTCCAACAG        |
| <i>GAPDH</i>    | AATGGGCAGCCGTTAGGAAA     | GCGCCAATACGACCAAATC        |
| <i>RUNX1</i>    | GGACGCCAGAAGGAAGTCAA     | TCGCAGCCAGGAAAGAAGTT       |
| <i>HSF-1</i>    | CCGTGGACACCCTCTTGTC      | GAGCTCATTCTTGTCAGGCA       |
| <i>STAT3</i>    | CTGCCCATACCTGAAGACC      | TCCTCACATGGGGGAGGTAG       |
| <i>NF-κB</i>    | CCAACAGATGGCCCATACCT     | AACCTTTGCTGGTCCCACAT       |
| <b>ChIP</b>     |                          |                            |
| PU.1-1          | GATGGATGGGTAGATGAGTG     | CAGCCATCCACAAATCCACC       |
| PU.1-2          | TGGATGGCTGGATGAATGAG     | ATGCAGTATCTTTTTGGTAT       |
| PU.1-3          | ACTGCATTTGTATGTTTATC     | CCAATTCCATCCATGTTGC        |
| PU.1-4          | GATACTGCATTTGTATGTTT     | GATAATGTCCTCCAATTCC        |
| PU.1-5          | AGGACATTATCATATGCGAA     | CATTCATTCATCCATCCATC       |
| PU.1-6          | TGAATGAATGAAGGGGTAGG     | CAGTCCATCAGTCCACAA         |
| PU.1-7          | GTGGACTGATGGACTGATAG     | CCCATGCATCTATTTGTC         |
| PU.1-8          | GACAGACAAATAGATGCATG     | CCTAGGGCTCTGTTTCCAGCC      |
| PU.1-9          | ATAGATGCATGGGAAAACAG     | TGGGTCTTATACCCTCC          |
| PU.1-10         | AGCAGCACTATGCTGAAGAC     | GCTCTAACCCAACAAATGC        |
| PU.1-11         | TAGAGCAAAAAGCCTCCCAGT    | AACCCGTTTTGCATAAATCTCT     |
| PU.1-12         | ACGGGTTGGGGCGGTGATGT     | AATGCAGAGCCCCTCAGGATG      |
| SOX4-I          | TTAAAGAGCGTGCAAGAA       | AGCCAAGACTGTGAAAGG         |
| SOX4-II         | CAGTATTCACCCTTACCC       | GATTTCTGCTGCCTCTTT         |
| SOX4-III        | TACGGAGCACTACCTAAT       | GTAAATCCCTTCAGAACC         |
| SOX4-IV         | CCCTTCGATTCAAGTAAC       | TAGGCAGATTTCCAGAGT         |
| SOX4-V          | ACTTTATAGAGGGTTGTTGT     | GTCTGCCTGTTATTACTT         |
| <b>Plasmid</b>  |                          |                            |
| pGL3- SOX4 (P1) | CGAGCTCAGGTGCCTGTGTGTTT  | GGAAGATCTTCCGCCTCGCGCCTCTT |
| pGL3- SOX4 (P2) | CGAGCTCCAATGGAATGGCAGGGT | GGAAGATCTTCCGCCTCGCGCCTCTT |
| pGL3- SOX4 (P3) | CGAGCTACAATACATCAGGTGC   | GGAAGATCTTCCGCCTCGCGCCTCTT |
| pGL3- SOX4 (P4) | CGAGCTCGAGCACTACCTAATGTG | GGAAGATCTTCCGCCTCGCGCCTCTT |
| pGL3- SOX4 (P5) | CGAGCTCTGCACCAGAGGCTGATT | GGAAGATCTTCCGCCTCGCGCCTCTT |
| pGL3- SOX4 (P6) | CGAGCTCAGGTGCCTGTGTGTTT  | GGAAGATCTAATCAGCCTCTGGTGCA |
